# Supplementary material for: Alternative Excipients for Protein Stabilization in Protein Therapeutics: Overcoming the Limitations of Polysorbates
Source: MDPI journal article supplement (doi:10.3390/pharmaceutics14122575), 2022-11-23
Supplement: s1 [file s1]

## Supplementary Information

**Table S1. FDA and CBER-approved protein biopharmaceuticals containing PS20 and PS80 as a surfactant indicating the amount of surfactant per mL. Data obtained from <https://www.accessdata.fda.gov/scripts/cder/iig/index.cfm> (accessed on 10 August 2022).**

| Commercial name                   | FDA Approval year | Biotherapeutic type                                                                                                                                                                                                                       | Route of administration | Surfactant | Concentration |
|-----------------------------------|-------------------|-------------------------------------------------------------------------------------------------------------------------------------------------------------------------------------------------------------------------------------------|-------------------------|------------|---------------|
| ACTIVASE (alteplase)              | 1987              | a recombinant a tissue plasminogen activator                                                                                                                                                                                              | IV                      | PS80       | 0.1 mg/mL     |
| NEUPOGEN® (filgrastim)            | 1991              | a recombinant 175 amino acid human granulocyte colony-stimulating factor                                                                                                                                                                  | SC, IV                  | PS80       | 0.04 mg/mL    |
| CEREZYME® (imiglucerase)          | 1994              | an analogue of the human enzyme $\beta$ -glucocerebrosidase, a lysosomal glycoprotein enzyme which catalyzes the hydrolysis of the glycolipid glucocerebroside to glucose and ceramide                                                    | IV                      | PS80       | 0.1 mg/mL     |
| ReoPro® (abciximab)               | 1994              | fragment of the chimeric human-murine 7E3 mAb binding to the glycoprotein IIb/IIIa receptor of human platelets as well as the vitronectin ( $\alpha$ v $\beta$ 3) receptor on platelets, vessel wall endothelial, and smooth muscle cells | IV                      | PS80       | 0.01 mg/mL    |
| RITUXAN (rituximab)               | 1997              | a genetically engineered chimeric murine/human mAb (IgG1 $\kappa$ ) directed against the CD20 antigen                                                                                                                                     | IV                      | PS80       | 0.7 mg/mL     |
| ZENAPAX® (daclizumab)             | 1997              | humanized mAb (IgG1) binding specifically to the alpha subunit (p55 alpha, CD25, or Tac subunit) of the human high-affinity interleukin-2 receptor expressed on the surface of activated lymphocytes                                      | IV                      | PS80       | 0.2 mg/mL     |
| HERCEPTIN (Trastuzumab)           | 1998              | a recombinant humanized mAb (IgG1 $\kappa$ ) selectively and effectively binding to the extracellular domain of the human epidermal growth factor receptor 2 protein                                                                      | IV                      | PS20       | 0.09 mg/mL    |
| REMICADE (infliximab)             | 1998              | a chimeric mAb (IgG1 $\kappa$ ; composed of human constant and murine variable regions) specific for human tumor necrosis factor-alpha                                                                                                    | IV                      | PS80       | 0.05 mg/mL    |
| CAMPATH® (alemtuzumab)            | 2001              | a recombinant humanized mAb against the cell surface glycoprotein CD52                                                                                                                                                                    | IV                      | PS80       | 0.1mg/mL      |
| LEMTRADA® (alemtuzumab)           | 2001              | a recombinant humanized mAb against the cell surface glycoprotein CD52                                                                                                                                                                    | IV                      | PS80       | 0.1 mg/mL     |
| HUMIRA® (adalimumab)              | 2002              | a recombinant human mAb (IgG1) specific for human tumor necrosis factor                                                                                                                                                                   | SC                      | PS80       | 1 mg/mL       |
| PEGASYS (peginterferon alfa-2a)   | 2002              | a covalent conjugate of recombinant alfa-2a interferon with a single branched bis-monomethoxy polyethylene glycol                                                                                                                         | SC                      | PS80       | 0.05 mg/mL    |
| XOLAIR® (omalizumab)              | 2003              | A recombinant humanized mAb (IgG $\kappa$ ) binding to human immunoglobulin E                                                                                                                                                             | SC                      | PS20       | 0.36 mg/mL    |
| AVASTIN® (bevacizumab)            | 2004              | a recombinant humanized mAb (IgG1) binding to and inhibiting the biologic activity of human vascular endothelial growth factor                                                                                                            | IV                      | PS20       | 0.4 mg/mL     |
| TYSABRI (natalizumab)             | 2004              | a recombinant humanized mAb (IgG4 $\kappa$ ) binding to binds to $\alpha$ 4-integrin                                                                                                                                                      | IV                      | PS80       | 0.2 mg/mL     |
| LUCENTIS® (ranibizumab injection) | 2006              | a recombinant humanized mAb (IgG $\kappa$ ) binding to and inhibiting the biologic activity of human vascular endothelial growth factor A                                                                                                 | IVT                     | PS20       | 0.1 mg/mL     |

|                                         |      |                                                                                                                                                                                                                                |        |      |             |
|-----------------------------------------|------|--------------------------------------------------------------------------------------------------------------------------------------------------------------------------------------------------------------------------------|--------|------|-------------|
| SOLIRIS®<br>(eculizumab)                | 2007 | a recombinant humanized mAb (IgG2/4κ) inhibiting the complement                                                                                                                                                                | IV     | PS80 | 0.22 mg/mL  |
| CIMZIA<br>(certolizumab pegol)          | 2008 | a recombinant, humanized Ab Fab' fragment, with specificity for human tumor necrosis factor alpha                                                                                                                              | SC     | PS20 | 0.1 mg/mL   |
| Nplate®<br>(romiplostim)                | 2008 | an Fc-peptide fusion protein (peptibody) that activates intracellular transcriptional pathways leading to increased platelet production via the thrombopoietin receptor                                                        | SC     | PS20 | 0.042 mg/mL |
| ARZERRA®<br>(ofatumumab)                | 2009 | A humanized mAb (IgG1κ) binding specifically to both the small and large extracellular loops of the CD20 molecule                                                                                                              | IV     | PS80 | 0.2 mg/mL   |
| ILARIS®<br>(canakinumab)                | 2009 | human mAb (IgG1κ) binding and inhibiting the activity of human interleukin-1β                                                                                                                                                  | SC     | PS80 | 0.6 mg/mL   |
| SIMPONI ARIA®<br>(golimumab)            | 2009 | Human mAb (IgG1κ) specific for human tumor necrosis factor alpha                                                                                                                                                               | SC, IV | PS80 | 0.15 mg/mL  |
| STELARA®<br>(ustekinumab)               | 2009 | a human mAb (IgG1κ) binding with specificity to the p40 protein subunit used by both the interleukin-12 and interleukin-23                                                                                                     | SC, IV | PS80 | 0.04 mg/mL  |
| ACTEMRA®<br>(tocilizumab)               | 2010 | a recombinant humanized mAb (IgG1κ) binding to interleukin 6 receptor                                                                                                                                                          | SC, IV | PS80 | 0.5 mg/mL   |
| Prolia®<br>(denosumab)                  | 2010 | a human mAb (IgG2) with affinity and specificity for human receptor activator of nuclear factor kappa-B ligand                                                                                                                 | SC     | PS20 | 0.1 mg/mL   |
| ADCETRIS®<br>(brentuximab vedotin)      | 2011 | an CD30-directed antibody-drug conjugate consisting a chimeric AB (IgG1) specific for human CD30, the microtubule disrupting agent monomethyl auristatin E (MMAE) covalently bond together through a protease-cleavable linker | IV     | PS80 | 0.2 mg/mL   |
| BENLYSTA<br>(belimumab)                 | 2011 | a human IgG1λ mAb specific for soluble human B lymphocyte stimulator protein                                                                                                                                                   | SC, IV | PS80 | 0.4 mg/mL   |
| EYLEA™<br>(aflibercept)                 | 2011 | a recombinant fusion protein (portions of human vascular endothelial growth factor receptors 1 and 2 extracellular domains fused to the constant fragment of human IgG1)                                                       | IVT    | PS20 | 0.3 mg/mL   |
| YERVOY®<br>(ipilimumab)                 | 2011 | a recombinant, human mAb (IgG1κ) binding to the cytotoxic lymphocyte-associated antigen 4                                                                                                                                      | IV     | PS80 | 0.1 mg/mL   |
| ELELYSO<br>(taliglucerase alfa)         | 2012 | a hydrolytic lysosomal glucocerebroside-specific enzyme catalyzing the hydrolysis of the glycolipid glucocerebroside to glucose and ceramide                                                                                   | IV     | PS80 | 0.11 mg/mL  |
| GRANIX®<br>(tbo-filgrastim)             | 2012 | a non-glycosylated recombinant methionyl human granulocyte colony-stimulating growth factor                                                                                                                                    | SC     | PS80 | 0.055 mg/mL |
| PERJETA<br>(pertuzumab)                 | 2012 | a recombinant humanized mAb targeting the subdomain II of the human epidermal growth factor receptor 2                                                                                                                         | IV     | PS20 | 0.2 mg/mL   |
| RAXIBACUMAB                             | 2012 | a human mAb (IgG1λ) binding to the protective antigen component of B. anthracis toxin                                                                                                                                          | IV     | PS80 | 0.2 mg/mL   |
| ZALTRAP®<br>(ziv-aflibercept)           | 2012 | a recombinant fusion protein (portions of human vascular endothelial growth factor receptors 1 and 2 extracellular domains fused to the constant fragment of human IgG1)                                                       | IV     | PS20 | 1 mg/mL     |
| KADCYLA®<br>(ado-trastuzumab emtansine) | 2013 | trastuzumab (humanized mAb (IgG)) covalently linked to the microtubule inhibitory drug DM1 (a maytansine derivative) via the stable thioether linker MCC (4-[N-maleimidomethyl] cyclohexane-1-carboxylate)                     | IV     | PS20 | 0.2 mg/mL   |
| NOVOEIGHT                               | 2013 | recombinant antihemophilic factor                                                                                                                                                                                              | IV     | PS80 | 0.1 mg/mL   |
| RIXUBIS                                 | 2013 | recombinant coagulation factor IX                                                                                                                                                                                              | IV     | PS80 | 0.05 mg/mL  |

|                                     |      |                                                                                                                                                                                                                                                                                                                     |    |      |                                                                                     |
|-------------------------------------|------|---------------------------------------------------------------------------------------------------------------------------------------------------------------------------------------------------------------------------------------------------------------------------------------------------------------------|----|------|-------------------------------------------------------------------------------------|
| TRETTEN®                            | 2013 | recombinant coagulation factor XIII A-subunit                                                                                                                                                                                                                                                                       | IV | PS20 | 0.1 mg/mL                                                                           |
| ALPROLIX®                           | 2014 | recombinant coagulation factor IX, Fc fusion protein                                                                                                                                                                                                                                                                | IV | PS20 | Not available                                                                       |
| BLINCYTO®<br>(blinatumomab)         | 2014 | a bispecific CD19-directed CD3 T-cell engager                                                                                                                                                                                                                                                                       | IV | PS80 | 0.213 mg/mL                                                                         |
| CYRAMZA<br>(ramucirumab)            | 2014 | a recombinant human mAb (IgG1) against vascular endothelial growth factor receptor 2                                                                                                                                                                                                                                | IV | PS80 | 0.1 mg/mL                                                                           |
| ELOCTATE®                           | 2014 | recombinant antihemophilic factor, Fc fusion protein                                                                                                                                                                                                                                                                | IV | PS20 | Not available                                                                       |
| ENTYVIO<br>(vedolizumab)            | 2014 | a humanized mAb (IgG1) binding to the human $\alpha 4\beta 7$ integrin                                                                                                                                                                                                                                              | IV | PS80 | 0.625 mg/mL                                                                         |
| KEYTRUDA®<br>(pembrolizumab)        | 2014 | a humanized mAb (IgG4 $\kappa$ ) blocking the programmed death receptor-1                                                                                                                                                                                                                                           | IV | PS80 | 0.2 mg/mL                                                                           |
| MYALEPT™<br>(metreleptin)           | 2014 | a recombinant human leptin analog binding to and activates the leptin receptor                                                                                                                                                                                                                                      | SC | PS20 | 0.1 mg/mL                                                                           |
| OBIZUR                              |      | recombinant antihemophilic factor, porcine sequence                                                                                                                                                                                                                                                                 | IV | PS80 | 0.05 mg/mL                                                                          |
| OPDIVO<br>(nivolumab)               | 2014 | a mAb (IgG4 $\kappa$ ) blocking the programmed death receptor-1                                                                                                                                                                                                                                                     | IV | PS80 | 0.2 mg/mL                                                                           |
| PLEGRIDY<br>(peginterferon beta-1a) | 2014 | an interferon beta-1a covalently bond through the alpha amino group of the N-terminal amino acid residue to a single, linear 20,000 dalton methoxy poly(ethyleneglycol)-O-2-methylpropionaldehyde molecule                                                                                                          | SC | PS20 | 0.05 mg/mL                                                                          |
| SYLVANT<br>(siltuximab)             | 2014 | a human-mouse chimeric mAb binding to human interleukin-6                                                                                                                                                                                                                                                           | IV | PS80 | 0.16 mg/mL                                                                          |
| TANZEUM<br>(albiglutide)            | 2014 | a recombinant fusion protein comprised of 2 tandem copies of modified human glucagon-like peptide-1 genetically fused in tandem to human albumin, a glucagon-like peptide-1 ligand                                                                                                                                  | SC | PS80 | 0.1 mg/mL                                                                           |
| TRULICITY<br>(dulaglutide)          | 2014 | a fusion protein that consisting of 2 identical, disulfide-linked chains, each containing an N-terminal glucagon-like peptide-1 analog sequence covalently linked to the constant fragment of a modified human immunoglobulin G4 (IgG4) heavy chain by a small peptide linker, a glucagon-like peptide-1 antagonist | SC | PS80 | 0.2 mg/mL                                                                           |
| VIMIZIM<br>(elosulfase alfa)        | 2014 | a purified human hydrolytic lysosomal glycosaminoglycan-specific enzyme hydrolyzing sulfate from either galactose-6-sulfate or N-acetyl-galactosamine-6-sulfate on the non-reducing ends of the glycosaminoglycans keratan sulfate and chondroitin-6-sulfate                                                        | IV | PS20 | 0.1 mg/mL                                                                           |
| ADYNOVATE                           | 2015 | recombinant antihemophilic factor, PEGylated                                                                                                                                                                                                                                                                        | IV | PS80 | 0.25 mg/mL (for 250, 500, 750, 1000, 1500 IU),<br><br>0.1 mg/mL (for 2000, 3000 IU) |
| COSENTYX®<br>(secukinumab)          | 2015 | a recombinant human mAb (IgG1 $\kappa$ ) binding specifically to IL-17A                                                                                                                                                                                                                                             | SC | PS80 | 0.2 mg/mL (prefilled syringe)<br>0.6 mg/mL (lyophilized powder)                     |
| DARZALEX®<br>(daratumumab)          | 2015 | A human mAb (IgG1 $\kappa$ ) binding to CD38 antigen                                                                                                                                                                                                                                                                | IV | PS20 | 0.4 mg/mL                                                                           |
| EMPLICITI™<br>(elotuzumab)          | 2015 | a humanized recombinant monoclonal antibody directed to signaling lymphocytic activation molecule family member 7                                                                                                                                                                                                   | IV | PS80 | 0.26 mg/mL                                                                          |

|                                                                 |      |                                                                                                                                                                                                 |        |      |               |
|-----------------------------------------------------------------|------|-------------------------------------------------------------------------------------------------------------------------------------------------------------------------------------------------|--------|------|---------------|
| IXINITY®                                                        | 2015 | recombinant coagulation factor IX                                                                                                                                                               | IV     | PS80 | 0.075 mg/mL   |
| NUCALA<br>(mepolizumab)                                         | 2015 | a humanized recombinant mAb against interleukin-5                                                                                                                                               | SC     | PS80 | 0.67 mg/mL    |
| PORTRAZZA<br>(necitumumab)                                      | 2015 | a recombinant human mAb (IgG1κ) binding to the ligand binding site of the human epidermal growth factor receptor                                                                                | IV     | PS80 | 0.1 mg/mL     |
| PRALUENT®<br>(alirocumab)                                       | 2015 | a human mAb (IgG1) that targets proprotein convertase subtilisin kexin type 9                                                                                                                   | SC     | PS20 | 0.1 mg/mL     |
| PRAXBIND®<br>(idarucizumab)                                     | 2015 | humanized mAb fragment derived from an IgG1 isotype molecule, targeting the direct thrombin inhibitor dabigatran                                                                                | IV     | PS20 | 0.2 mg/mL     |
| REPATHA<br>(evolocumab)                                         | 2015 | a human mAb (IgG2) directed against human proprotein convertase subtilisin kexin 9                                                                                                              | SC     | PS80 | 0.1 mg/mL     |
| UNITUXIN™<br>(dinutuximab)                                      | 2015 | a chimeric mAb composed of murine variable heavy and light chain regions and the human constant region for the heavy chain IgG1 and light chain κ, binding to the glycolipid disialoganglioside | IV     | PS20 | 0.5 mg/mL     |
| VONVENDI                                                        | 2015 | recombinant von Willebrand factor                                                                                                                                                               | IV     | PS80 | 0.1 mg/mL     |
| ZARXIO™<br>(filgrastim-sndz)                                    | 2015 | a recombinant 175 amino acid human granulocyte colony-stimulating factor                                                                                                                        | SC, IV | PS80 | 0.04 mg/mL    |
| AFSTYLA®                                                        | 2016 | recombinant antihemophilic factor, single chain                                                                                                                                                 | IV     | PS80 | 0.2 mg/mL     |
| ANTHIM®<br>(obiltoxaximab)                                      | 2016 | a chimeric mAb (IgG1κ) binding to the protective antigen component of B. anthracis toxin                                                                                                        | IV     | PS80 | 0.1 mg/mL     |
| IDELVION®                                                       | 2016 | recombinant coagulation factor IX, albumin fusion protein                                                                                                                                       | IV     | PS80 | Not available |
| INFLECTRA<br>(infliximab-dyyb)                                  | 2016 | a chimeric mAb (IgG1κ) composed of human constant and murine variable regions binding specifically to human tumor necrosis factor-α                                                             | IV     | PS80 | 0.05 mg/mL    |
| KOVALTRY                                                        | 2016 | recombinant antihemophilic factor                                                                                                                                                               | IV     | PS80 | 80 ppm        |
| TALTZ<br>(ixekizumab)                                           | 2016 | a humanized mAb (IgG4) with neutralizing interleukin-17A                                                                                                                                        | SC     | PS80 | 0.3 mg/mL     |
| TECENTRIQ®<br>(atezolizumab)                                    | 2016 | an Fc-engineered, humanized, non-glycosylated Ab (IgG1κ) blocking the programmed cell death ligand 1                                                                                            | IV     | PS20 | 0.4 mg/mL     |
| ZINBRYTA<br>(daclizumab)                                        | 2016 | a humanized mAb binding to the alpha subunit of the interleukin-2 receptor (IL-2Rα, CD25)                                                                                                       | SC     | PS80 | 0.3 mg/mL     |
| DUPIXENT®<br>(dupilumab)                                        | 2017 | a human mAb (IgG4 subclass) binding to the IL-4Rα subunit and inhibits IL-4 and IL-13 signaling                                                                                                 | SC     | PS80 | 2 mg/mL       |
| KEVZARA<br>(sarilumab)                                          | 2017 | a human recombinant mAb (IgG1) binding to the IL-6 receptor                                                                                                                                     | SC     | PS20 | 2 mg/mL       |
| RITUXAN<br>HYCELA™<br>(rituximab and<br>hyaluronidase<br>human) | 2017 | a combination of rituximab (chimeric murine/human mAb (IgG1κ) against the CD20 antigen) and hyaluronidase human                                                                                 | SC     | PS80 | 0.6 mg/mL     |
| SILIQ™<br>(brodalumab)                                          | 2017 | a human mAb (IgG2κ) against human interleukin-17 receptor A                                                                                                                                     | SC     | PS20 | 0.1 mg/mL     |
| TREMFYA®<br>(guselkumab)                                        | 2017 | a human immunoglobulin G1 lambda (IgG1λ) mAb blocking interleukin-23                                                                                                                            | SC     | PS80 | 0.5 mg/mL     |
| AIMOVIG®<br>(erenumab-aooe)                                     | 2018 | a human mAb (IgG2) monoclonal antibody with high affinity binding to the calcitonin gene-related peptide receptor                                                                               | SC     | PS80 | 0.1 mg/mL     |

|                                                                   |      |                                                                                                                                                                                                                                                                                                        |     |      |            |
|-------------------------------------------------------------------|------|--------------------------------------------------------------------------------------------------------------------------------------------------------------------------------------------------------------------------------------------------------------------------------------------------------|-----|------|------------|
| AJOVY™<br>(fremanezumab-<br>vfrm)                                 | 2018 | a fully humanized mAb (IgG2Δa/κ) specific for calcitonin gene-related peptide ligand                                                                                                                                                                                                                   | SC  | PS80 | 0.2 mg/mL  |
| EMGALITY<br>(galcanezumab-<br>gnlm)                               | 2018 | a humanized mAb (IgG4) specific for calcitonin-gene related peptide ligand                                                                                                                                                                                                                             | SC  | PS80 | 0.5 mg/mL  |
| ILUMYA™<br>(tildrakizumab-asmn)                                   | 2018 | a humanized IgG1 IgGκ Ab binding to the p19 subunit of interleukin-23                                                                                                                                                                                                                                  | SC  | PS80 | 0.5 mg/mL  |
| TAKHZYRO™<br>(lanadelumab-flyo)                                   | 2018 | a non-plasma derived, recombinant, fully human mAb (IgG1κ - light chain) binding to plasma kallikrein and inhibiting its proteolytic activity                                                                                                                                                          | SC  | PS80 | 0.1 mg/mL  |
| TROGARZO™<br>(ibalizumab-uiyk)                                    | 2018 | a humanized mAb (IgG4) directed against CD4 domain 2                                                                                                                                                                                                                                                   | IV  | PS80 | 0.45 mg/mL |
| BEOVU®<br>(brolucizumab-dblI)                                     | 2019 | a recombinant human monoclonal single-chain variable AB fragment acting as a vascular endothelial growth factor inhibitor                                                                                                                                                                              | IVT | PS80 | 0.2 mg/mL  |
| HERCEPTIN<br>HYLECTA™<br>(trastuzumab and<br>hyaluronidase-oysk)  | 2019 | a combination of trastuzumab (humanized mAb (IgG1κ) with high affinity to the extracellular domain of the human epidermal growth factor receptor 2 protein) and hyaluronidase                                                                                                                          | SC  | PS20 | 0.4 mg/mL  |
| SKYRIZI®<br>(risankizumab-rzaa)                                   | 2019 | a humanized mAb (IgG1) against interleukin-23                                                                                                                                                                                                                                                          | SC  | PS20 | 0.2 mg/mL  |
| PHESGO<br>(pertuzumab,<br>trastuzumab, and<br>hyaluronidase-zzxf) | 2020 | a combination of pertuzumab (a recombinant humanized mAb targeting subdomain II of the human epidermal growth factor receptor 2 protein), trastuzumab (humanized mAb (IgG1κ) with high affinity to the extracellular domain of the human epidermal growth factor receptor 2 protein) and hyaluronidase | SC  | PS20 | 0.4 mg/mL  |
| VYEPTI™<br>(eptinezumab-jjmr)                                     | 2020 | a humanized mAb (IgG1) specific for calcitonin gene-related peptide ligand                                                                                                                                                                                                                             | IV  | PS80 | 0.15 mg/mL |
| ADUHELM™<br>(aducanumab-avwa)                                     | 2021 | a recombinant human mAb (IgG1) against aggregated soluble and insoluble forms of amyloid beta                                                                                                                                                                                                          | IV  | PS80 | 0.5 mg/mL  |
| DARZALEX<br>FASPRO®<br>(daratumumab and<br>hyaluronidase-fihj)    | 2021 | Combination of daratumumab (a human mAb (IgG1κ) binding to the CD38 antigen) and hyaluronidase                                                                                                                                                                                                         | SC  | PS20 | 0.4 mg/mL  |
| EVKEEZA™<br>(evinacumab-dgnb)                                     | 2021 | A recombinant mAb (IgG4) inhibiting angiopoietin-like protein 3                                                                                                                                                                                                                                        | IV  | PS80 | 1 mg/mL    |
| SUSVIMO™<br>(ranibizumab<br>injection)                            | 2021 | a recombinant humanized mAb fragment (IgG1κ) binding to and inhibiting human vascular endothelial growth factor-A                                                                                                                                                                                      | IVT | PS20 | 0.01 mg/mL |

Abbreviations: CD: cluster of differentiation, IgG: Immunoglobulin G, IV: intravenous, IVT: intravitreal, mAb: monoclonal antibody, PS20:

polysorbate 20, PS80: polysorbate 80, SC: subcutaneous
